# Supplementary material
Source: PubMed Central journal article supplement (PMC6450266)
Supplement: jamapediatr-173-326-s002.pdf [file jamapediatr-173-326-s002.pdf]

## Supplementary Online Content

Polonsky HM, Bauer KW, Fisher JO, et al. Effect of a breakfast in the classroom initiative on obesity in urban school-aged children: a cluster randomized clinical trial. *JAMA Pediatr*. Published online February 25, 2019.  
doi:10.1001/jamapediatrics.2018.5531

**eTable.** Sociodemographic Characteristics of Total Sample, Students Lost to Follow-up by Study End Point, and Students Retained in the Final Sample

This supplementary material has been provided by the authors to give readers additional information about their work.

**eTable. Sociodemographic Characteristics of Total Sample, Students Lost to Follow-up by Study End Point, and Students Retained in the Final Sample**

|                                                               | <b>Total Sample<br/>(N=1362)</b> | <b>Lost to Follow-<br/>up<br/>(N=569)</b> | <b>Retained<br/>(N=793)</b> |
|---------------------------------------------------------------|----------------------------------|-------------------------------------------|-----------------------------|
| Age (mean (SD))                                               | 10.8 (0.96)                      | 10.7 (0.95)                               | 10.8 (0.96)                 |
| School Breakfast Program Participation Rate (median (Q1, Q3)) | 18.2 (3.0, 55.2)                 | 21.2 (4.5, 57.8)                          | 15.9 (1.7, 53.6)            |
|                                                               | <b>N (%)</b>                     | <b>n (%)</b>                              | <b>n (%)</b>                |
| <b>Sex</b>                                                    |                                  |                                           |                             |
| Female                                                        | 700 (51.4%)                      | 298 (42.6%)                               | 402 (57.4%)                 |
| Male                                                          | 662 (48.6%)                      | 271 (40.9%)                               | 391 (59.1%)                 |
| <b>Race/Ethnicity</b>                                         |                                  |                                           |                             |
| Asian                                                         | 83 (6.1%)                        | 17 (20.5%)                                | 66 (79.5%)                  |
| Black                                                         | 907 (66.6%)                      | 423 (46.6%)                               | 484 (53.4%)                 |
| Hispanic                                                      | 233 (17.1%)                      | 87 (37.3%)                                | 146 (62.7%)                 |
| Mixed/Other                                                   | 39 (2.9%)                        | 17 (43.6%)                                | 22 (56.4%)                  |
| White                                                         | 100 (7.3%)                       | 25 (25.0%)                                | 75 (75.0%)                  |
| <b>Grade Level</b>                                            |                                  |                                           |                             |
| 4 <sup>th</sup>                                               | 479 (35.2%)                      | 216 (45.1%)                               | 263 (54.9%)                 |
| 5 <sup>th</sup>                                               | 473 (34.7%)                      | 203 (42.9%)                               | 270 (57.1%)                 |
| 6 <sup>th</sup>                                               | 410 (30.1%)                      | 150 (36.6%)                               | 260 (63.4%)                 |
| Eligible for Free/Reduced Price Meals                         | 1075 (78.9%)                     | 471 (43.8%)                               | 604 (56.2%)                 |
| <b>Weight Status</b>                                          |                                  |                                           |                             |
| Underweight                                                   | 34 (2.5%)                        | 16 (47.1%)                                | 18 (52.9%)                  |
| Normal weight                                                 | 796 (58.4%)                      | 346 (43.5%)                               | 450 (56.5%)                 |
| Overweight                                                    | 241 (17.7%)                      | 99 (41.1%)                                | 142 (58.9%)                 |
| Obese                                                         | 291 (21.4%)                      | 108 (37.1%)                               | 183 (62.9%)                 |
| <b>Intervention Condition</b>                                 |                                  |                                           |                             |
| Intervention                                                  | 639 (46.9%)                      | 289 (45.2%)                               | 350 (54.8%)                 |
| Control                                                       | 723 (53.1%)                      | 280 (38.7%)                               | 443 (61.3%)                 |
