# Supplementary material
Source: PubMed Central journal article supplement (PMC6450266)
Supplement: jamapediatr-173-326-s003.pdf [file jamapediatr-173-326-s003.pdf]

## Data Sharing Statement

Polonsky. Effect of a Breakfast in the Classroom Initiative on Obesity in Urban School-Aged Children. *JAMA Pediatr*. Published February 25, 2019. 10.1001/jamapediatrics.2018.5531

### Data

**Data available:** Yes

**Data types:** Deidentified participant data, Data dictionary

**How to access data:** Data will be made available upon request.

Requests can be sent to Alexandra Hanlon at

[al\\_hanlon@comcast.net](mailto:al_hanlon@comcast.net).

**When available:** With publication

### Supporting Documents

**Document types:** None

### Additional Information

**Who can access the data:** Data will be made available to researchers whose proposed use of the data has been approved.

**Types of analyses:** Data will be made available to researchers whose proposed use of the data has been approved.

**Mechanisms of data availability:** Data will be made available to researchers whose proposed use of the data has been approved.
